# Supplementary material for: Novel glauconite compounds improve soil properties and sugar beet (Beta vulgaris L.) yields in saline soils
Source: PeerJ. 2025 Jun 18;13:e19452. doi: 10.7717/peerj.19452 (PMC12182053; doi:10.7717/peerj.19452)
Supplement: Supplemental Information 1 [file peerj-13-19452-s001.xlsx]

## Sheet: Sheet1
Treatments	Season	Replicates	Shoot yield	Root yield (t/fed)	Sugar Percentage (Sucrose%)	K (meq /100g beet)	Na (meq /100g beet)	Ammonium (meq /100g beet)	Alkalinity of sugar	Purity (%)	Sugar losses to molasses (%)	%Extractable Sugar	%Extractbility	Total Sugar yield (k/fad )	Extractable sugar (yield/fed)	Sugar/loss to molasses yield (k/fed )	Plan Shoot Mn	Plant shoot Fe	Plant Root Fe	Plant Root mn
1	1	1	15.6116	4.302	14.42	5.81	5.41	1.41	7.95745	86.8614	2.4233	11.3967	79.034	2251.19	1779.2	378.315	5.75	25.25	7.25	39.875
1	1	2	14.0504	3.8718	12.978	5.229	4.869	1.269	7.1617	78.1752	2.18097	10.257	71.1306	2026.07	1601.28	340.484	5.175	22.725	6.525	35.8875
1	1	3	17.1727	4.7322	15.862	6.391	5.951	1.551	8.75319	95.5475	2.66563	12.5364	86.9374	2476.31	1957.12	416.147	6.325	27.775	7.975	43.8625
1	1	4	15.6194	4.30209	14.4203	5.81012	5.41011	1.41003	7.95761	86.8631	2.42335	11.3969	79.0356	2251.23	1779.24	378.323	5.75011	25.2505	7.25014	39.8758
2	1	1	23.8006	6.3752	16.93	6.73	3.49	2.37	4.31224	88.7481	2.5233	13.8067	81.5517	4029.44	3286.07	600.56	6.75	72.5	8.52	55.125
2	1	2	21.4205	5.73768	15.237	6.057	3.141	2.133	3.88101	79.8733	2.27097	12.426	73.3965	3626.49	2957.47	540.504	6.075	65.25	7.668	49.6125
2	1	3	26.1806	7.01272	18.623	7.403	3.839	2.607	4.74346	97.6229	2.77563	15.1874	89.7069	4432.38	3614.68	660.616	7.425	79.75	9.372	60.6375
2	1	4	23.8125	6.37533	16.9303	6.73013	3.49007	2.37005	4.31232	88.7499	2.52335	13.807	81.5533	4029.52	3286.14	600.572	6.75013	72.5014	8.52017	55.1261
3	1	1	18.4425	4.94	18.03	6.24	2.78	2.62	3.44275	90.1474	2.4178	15.0122	83.2623	3325.19	2768.63	445.903	7.25	176.125	8.75	182.5
3	1	2	16.5983	4.446	16.227	5.616	2.502	2.358	3.09847	81.1327	2.17602	13.511	74.9361	2992.67	2491.77	401.313	6.525	158.513	7.875	164.25
3	1	3	20.2868	5.434	19.833	6.864	3.058	2.882	3.78702	99.1622	2.65958	16.5134	91.5886	3657.71	3045.49	490.494	7.975	193.738	9.625	200.75
3	1	4	18.4517	4.9401	18.0304	6.24012	2.78006	2.62005	3.44282	90.1492	2.41785	15.0125	83.264	3325.25	2768.68	445.912	7.25014	176.129	8.75017	182.504
4	1	1	17.5495	4.7008	16.75	6.2	3.69	2.53	3.90909	88.7789	2.5171	13.6329	81.3904	2939.54	2392.51	441.739	39.23	83.875	9.12	41.375
4	1	2	15.7946	4.23072	15.075	5.58	3.321	2.277	3.51818	79.901	2.26539	12.2696	73.2514	2645.59	2153.26	397.565	35.307	75.4875	8.208	37.2375
4	1	3	19.3045	5.17088	18.425	6.82	4.059	2.783	4.3	97.6568	2.76881	14.9962	89.5295	3233.5	2631.76	485.913	43.153	92.2625	10.032	45.5125
4	1	4	17.5583	4.70089	16.7503	6.20012	3.69007	2.53005	3.90917	88.7807	2.51715	13.6332	81.3921	2939.6	2392.56	441.748	39.2308	83.8767	9.12018	41.3758
5	1	1	20.4227	5.4704	16.94	6.57	3.67	2.62	3.9084	88.5269	2.5886	13.7514	81.1771	3459.6	2808.4	528.661	39.42	83	9.31	68.275
5	1	2	18.3804	4.92336	15.246	5.913	3.303	2.358	3.51756	79.6742	2.32974	12.3763	73.0594	3113.64	2527.56	475.795	35.478	74.7	8.379	61.4475
5	1	3	22.4649	6.01744	18.634	7.227	4.037	2.882	4.29924	97.3796	2.84746	15.1265	89.2948	3805.56	3089.24	581.527	43.362	91.3	10.241	75.1025
5	1	4	20.4329	5.47051	16.9403	6.57013	3.67007	2.62005	3.90848	88.5287	2.58865	13.7517	81.1787	3459.67	2808.46	528.672	39.4208	83.0017	9.31019	68.2764
6	1	1	16.0741	4.3056	14.85	5.93	5.4	1.81	6.25967	86.7332	2.5387	11.7113	78.864	2387.01	1882.49	408.074	6.75	192.25	8.12	150
6	1	2	14.4667	3.87504	13.365	5.337	4.86	1.629	5.6337	78.0599	2.28483	10.5402	70.9776	2148.31	1694.24	367.266	6.075	173.025	7.308	135
6	1	3	17.6815	4.73616	16.335	6.523	5.94	1.991	6.88564	95.4065	2.79257	12.8824	86.7504	2625.71	2070.74	448.881	7.425	211.475	8.932	165
6	1	4	16.0822	4.30569	14.8503	5.93012	5.40011	1.81004	6.25979	86.7349	2.53875	11.7115	78.8656	2387.05	1882.53	408.082	6.75013	192.254	8.12016	150.003
7	1	1	16.1518	4.3264	14.94	5.97	5.15	2.13	5.22066	86.7042	2.5893	11.7507	78.6526	2413.07	1897.95	418.218	7.25	201.75	8.51	169.875
7	1	2	14.5366	3.89376	13.446	5.373	4.635	1.917	4.69859	78.0338	2.33037	10.5756	70.7873	2171.77	1708.15	376.396	6.525	181.575	7.659	152.888
7	1	3	17.7669	4.75904	16.434	6.567	5.665	2.343	5.74272	95.3746	2.84823	12.9258	86.5179	2654.38	2087.74	460.04	7.975	221.925	9.361	186.863
7	1	4	16.1598	4.32649	14.9403	5.97012	5.1501	2.13004	5.22076	86.7059	2.58935	11.7509	78.6542	2413.12	1897.98	418.226	7.25014	201.754	8.51017	169.878
8	1	1	24.15	6.58779	17.59	6.48	3.24	3.49	2.7851	88.6433	2.7333	14.2567	81.05	4247.98	3442.99	660.092	54.75	312.5	10.75	532.125
8	1	2	21.735	5.92901	15.831	5.832	2.916	3.141	2.50659	79.779	2.45997	12.831	72.945	3823.19	3098.69	594.083	49.275	281.25	9.675	478.913
8	1	3	26.565	7.24657	19.349	7.128	3.564	3.839	3.06361	97.5076	3.00663	15.6824	89.155	4672.78	3787.29	726.101	60.225	343.75	11.825	585.338
8	1	4	24.1621	6.58792	17.5904	6.48013	3.24006	3.49007	2.78516	88.6451	2.73335	14.257	81.0516	4248.07	3443.06	660.105	54.7511	312.506	10.7502	532.136
9	1	1	31.2941	8.3824	18.19	7.63	3.06	3.6	2.96944	88.1495	2.8966	14.6934	80.7774	5692.39	4598.16	906.463	54.87	370.625	10.81	535.125
9	1	2	28.1646	7.54416	16.371	6.867	2.754	3.24	2.6725	79.3346	2.60694	13.2241	72.6996	5123.15	4138.34	815.817	49.383	333.562	9.729	481.612
9	1	3	34.4235	9.22064	20.009	8.393	3.366	3.96	3.26639	96.9645	3.18626	16.1627	88.8551	6261.63	5057.98	997.11	60.357	407.688	11.891	588.637
9	1	4	31.3097	8.38257	18.1904	7.63015	3.06006	3.60007	2.9695	88.1513	2.89666	14.6937	80.779	5692.5	4598.25	906.482	54.8711	370.632	10.8102	535.136
