# Supplementary material for: Novel glauconite compounds improve soil properties and sugar beet (Beta vulgaris L.) yields in saline soils
Source: PeerJ. 2025 Jun 18;13:e19452. doi: 10.7717/peerj.19452 (PMC12182053; doi:10.7717/peerj.19452)
Supplement: Supplemental Information 2 [file peerj-13-19452-s002.xlsx]

## Sheet: Sheet1
Treatments	Season	Replicates	Soil Available NH4	Soil Available No3	AN	Soil Available K	pH	EC	ESP	Cu (ppm)	Fe (ppm)	Mn(ppm)	Zn (ppm)	IR	OM	PR	BD
1	1	1	27.552	20.664	48.216	181.35	8.62	4.76	13.8149	0.1868	3.95517	23.011	0.176	0.72	1.1595	380	1.445
1	1	2	24.7968	18.5976	43.3944	163.215	7.758	4.284	14.1904	0.16812	3.55966	20.7099	0.1584	0.648	1.04355	342	1.3005
1	1	3	30.3072	22.7304	53.0376	199.485	9.482	5.236	13.4625	0.20548	4.35069	25.3121	0.1936	0.792	1.27545	418	1.5895
1	1	4	27.5526	20.6644	48.217	181.354	8.62017	4.7601	12.3041	0.186804	3.95525	23.0115	0.176004	0.720014	1.15952	380.008	1.44503
2	1	1	32.44	28.8	61.24	398.53	8.54	3.752	10.8585	0.265	4.66321	35.3372	0.184	0.79	2.0266	280	1.39
2	1	2	29.196	25.92	55.116	358.677	7.686	3.3768	10.8099	0.2385	4.19688	31.8035	0.1656	0.711	1.82394	252	1.251
2	1	3	35.684	31.68	67.364	438.383	9.394	4.1272	12.3518	0.2915	5.12953	38.871	0.2024	0.869	2.22926	308	1.529
2	1	4	32.4406	28.8006	61.2412	398.538	8.54017	3.75208	12.692	0.265005	4.6633	35.338	0.184004	0.790016	2.02664	280.006	1.39003
3	1	1	44.772	43.216	87.988	374.74	8.53	3.36	11.3957	0.338	5.50311	58.979	0.223	1.08	2.36076	250	1.34
3	1	2	40.2948	38.8944	79.1892	337.266	7.677	3.024	10.3843	0.3042	4.9528	53.0811	0.2007	0.972	2.12468	225	1.206
3	1	3	49.2492	47.5376	96.7868	412.214	9.383	3.696	10.2817	0.3718	6.05342	64.8768	0.2453	1.188	2.59684	275	1.474
3	1	4	44.7729	43.2169	87.9898	374.747	8.53017	3.36007	10.229	0.338007	5.50322	58.9801	0.223004	1.08002	2.36081	250.005	1.34003
4	1	1	41.66	20.664	62.324	340.93	8.49	3.728	12.312	0.484	4.52269	83.3985	0.715	0.81	1.3923	350	1.43
4	1	2	37.494	18.5976	56.0916	306.837	7.641	3.3552	12.667	0.4356	4.07042	75.0587	0.6435	0.729	1.25307	315	1.287
4	1	3	45.826	22.7304	68.5564	375.023	9.339	4.1008	11.9872	0.5324	4.97496	91.7384	0.7865	0.891	1.53153	385	1.573
4	1	4	41.6608	20.6644	62.3252	340.937	8.49017	3.72807	10.9329	0.48401	4.52278	83.4002	0.715014	0.810016	1.39233	350.007	1.43003
5	1	1	55.48	17.28	72.76	343.83	8.49	3.648	12.0407	0.5268	12.1201	82.325	0.776	0.84	1.4688	350	1.43
5	1	2	49.932	15.552	65.484	309.447	7.641	3.2832	12.0464	0.47412	10.908	74.0925	0.6984	0.756	1.32192	315	1.287
5	1	3	61.028	19.008	80.036	378.213	9.339	4.0128	12.0407	0.57948	13.3321	90.5575	0.8536	0.924	1.61568	385	1.573
5	1	4	55.4811	17.2803	72.7615	343.837	8.49017	3.64807	12.0426	0.526811	12.1203	82.3266	0.776016	0.840017	1.46883	350.007	1.43003
6	1	1	34.44	17.22	51.66	193.44	8.61	4.688	10.2783	0.5034	4.29381	30.1452	0.181	0.72	1.175	370	1.45143
6	1	2	30.996	15.498	46.494	174.096	7.749	4.2192	10.28	0.45306	3.86443	27.1307	0.1629	0.648	1.0575	333	1.30628
6	1	3	37.884	18.942	56.826	212.784	9.471	5.1568	10.267	0.55374	4.7232	33.1597	0.1991	0.792	1.2925	407	1.59657
6	1	4	34.4407	17.2203	51.661	193.444	8.61017	4.68809	10.2834	0.50341	4.2939	30.1458	0.181004	0.720014	1.17502	370.007	1.45146
7	1	1	34.44	17.22	51.66	193.58	8.61	4.25	10.656	0.5092	4.90181	30.7988	0.12	0.81	1.1934	350	1.44
7	1	2	30.996	15.498	46.494	174.222	7.749	3.825	10.6597	0.45828	4.41163	27.7189	0.108	0.729	1.07406	315	1.296
7	1	3	37.884	18.942	56.826	212.938	9.471	4.675	10.6585	0.56012	5.39199	33.8787	0.132	0.891	1.31274	385	1.584
7	1	4	34.4407	17.2203	51.661	193.584	8.61017	4.25008	10.6563	0.50921	4.9019	30.7994	0.120002	0.810016	1.19342	350.007	1.44003
8	1	1	34.44	43.05	77.49	434.42	8.41	3.392	11.4836	0.5598	5.64479	95.888	0.768	1.07	1.8666	340	1.41
8	1	2	30.996	38.745	69.741	390.978	7.569	3.0528	11.4855	0.50382	5.08031	86.2992	0.6912	0.963	1.67994	306	1.269
8	1	3	37.884	47.355	85.239	477.862	9.251	3.7312	11.4891	0.61578	6.20927	105.477	0.8448	1.177	2.05326	374	1.551
8	1	4	34.4407	43.0509	77.4915	434.429	8.41017	3.39207	11.4837	0.559811	5.64491	95.8899	0.768015	1.07002	1.86664	340.007	1.41003
9	1	1	51.66	34.44	86.1	472.97	8.25	3.328	10.1812	0.5951	5.72075	96.1198	0.772	1.17	1.9431	330	1.39
9	1	2	46.494	30.996	77.49	425.673	7.425	2.9952	10.1862	0.53559	5.14868	86.5078	0.6948	1.053	1.74879	297	1.251
9	1	3	56.826	37.884	94.71	520.267	9.075	3.6608	10.1829	0.65461	6.29283	105.732	0.8492	1.287	2.13741	363	1.529
9	1	4	51.661	34.4407	86.1017	472.979	8.25016	3.32807	10.17	0.595112	5.72087	96.1217	0.772015	1.17002	1.94314	330.007	1.39003
